# Supplementary material for: Abiotic redox reactions in hydrothermal mixing zones: Decreased energy availability for the subsurface biosphere
Source: PubMed Central journal article supplement — Proc Natl Acad Sci U S A. 2020 Aug 12;117(34):20453–61. doi: 10.1073/pnas.2003108117 (PMC7456078; doi:10.1073/pnas.2003108117), 2020-08-12
Supplement: pnas.2003108117.sapp.pdf [file pnas.2003108117.sapp.pdf]

## SUPPORTING INFORMATION APPENDIX

**Table S1.** Additional aqueous fluid compositions and stable and radioisotope values in mixing zones at the Piccard vent field.

| Vent (Year)                  | Sample <sup>a</sup> | Na<br>(mm) | Cl<br>(mm) | K<br>(mm) | SiO <sub>2</sub><br>(mm) | Li<br>( $\mu$ m) | Rb<br>( $\mu$ m) | Br<br>(mm) | Sr<br>( $\mu$ m) | <sup>87</sup> Sr/ <sup>86</sup> Sr | $\Sigma$ NH <sub>4</sub><br>( $\mu$ m) | CH <sub>3</sub> SH<br>(nM) | $\delta^{13}$ C <sub>CO2</sub><br>(‰) |
|------------------------------|---------------------|------------|------------|-----------|--------------------------|------------------|------------------|------------|------------------|------------------------------------|----------------------------------------|----------------------------|---------------------------------------|
| Beebe Endmember <sup>b</sup> |                     | 314        | 349        | 11.4      | 20.0                     | 421              | 5.59             | 0.61       | 21.9             | 0.7046                             | 36 <sup>c</sup>                        | 11.9 <sup>c</sup>          | –                                     |
| Hot Chimlet 1 (2012)         | J2-619-IGT6         | 418        | 484        | 10.3      | 5.80                     | 141              | 2.61             | 0.79       | 54.4             | –                                  | 14.2                                   | 1760 <sup>c</sup>          | -4.3 <sup>a</sup>                     |
|                              | J2-619-IGT3         | 411        | 471        | 10.4      | 6.37                     | 154              | 2.71             | 0.77       | 51.8             | 0.70855                            | 16.9                                   | 1760 <sup>c</sup>          | -4.2 <sup>d</sup>                     |
| Hot Chimlet 1 (2013)         | N59-IGT6            | 429        | 498        | 10.4      | 2.81                     | 96.6             | 1.94             | 0.78       | 72.1             | –                                  | 9.48                                   | –                          | –                                     |
|                              | N59-IGT4            | 454        | 530        | 10.3      | 0.83                     | 42.8             | 1.32             | 0.81       | 77.4             | –                                  | 2.58                                   | –                          | –                                     |
| Hot Chimlet 3 (2013)         | N62-IGT8            | 445        | 520        | 10.4      | 1.83                     | 66.0             | 1.64             | 0.81       | 76.8             | –                                  | 8.15                                   | –                          | –                                     |
|                              | N62-IGT7            | 408        | 472        | 10.6      | 2.60                     | 150              | 2.40             | 0.75       | 65.6             | –                                  | 15.9                                   | –                          | –                                     |
| Hot Chimlet 2 (2012)         | J2-620-IGT4         | 445        | 511        | 10.2      | 2.36                     | 66.1             | 1.81             | 0.86       | 76.4             | –                                  | 6.17                                   | 430 <sup>c</sup>           | -4.6                                  |
|                              | J2-620-IGT8         | 451        | 526        | 10.4      | 1.68                     | 51.9             | 1.64             | 0.89       | 81.6             | –                                  | 2.48                                   | 292 <sup>c</sup>           | -5.7                                  |
| Shrimp Gulley 1 (2012)       | J2-620-IGT1         | 438        | 510        | 10.2      | 3.33                     | 86.7             | 2.03             | 0.79       | 74.9             | 0.70894                            | 7.73                                   | 144 <sup>c</sup>           | -4.0                                  |
|                              | J2-620-IGT2         | 443        | 511        | 10.3      | 2.94                     | 77.2             | 1.94             | 0.81       | 77.9             | –                                  | 3.39                                   | 83.4 <sup>c</sup>          | -4.2                                  |
| Shrimp Gulley 3 (2013)       | N63-IGT6            | 446        | 519        | 10.5      | 1.93                     | 64.2             | 1.61             | 0.81       | 77.8             | –                                  | 9.62                                   | –                          | –                                     |
| Shrimp Gulley 2 (2012)       | J2-618-IGT1         | 455        | 528        | 10.3      | 1.52                     | 46.6             | 1.57             | 0.80       | 83.7             | –                                  | 2.94                                   | 50.4 <sup>c</sup>          | -5.1                                  |
|                              | J2-618-IGT3         | 459        | 522        | 10.3      | 1.46                     | 46.8             | 1.58             | 0.76       | 83.6             | –                                  | 0.53                                   | 44.0 <sup>c</sup>          | -5.6                                  |
| Bottom Seawater              |                     | 462        | 540        | 10.4      | 0.06                     | 26.5             | 1.24             | 0.82       | 88.5             | 0.7092                             | 0.10                                   | 0.00 <sup>c</sup>          | –                                     |

<sup>a</sup>Jason (J2) or Nereus (N##) dive number and isobaric gas-tight sampler number (-IGT).

<sup>b</sup>Average high-temperature vent endmember (For Beebe 1, 3, 5, and Beebe Woods; McDermott et al., 2018.) See McDermott et al. (2018) for IGT data from high temperature fluid samples.

<sup>c</sup>Data from Reeves et al. (2014).  $\Sigma$ NH<sub>4</sub> and CH<sub>3</sub>SH Beebe Endmember reflects the average of two similar measurements for each species.

<sup>d</sup>Radiocarbon  $\Delta^{14}$ C measurement on  $\Sigma$ CO<sub>2</sub> is: Measured Fm = 0.1501 $\pm$ 0.0014, Corrected Fm = -0.0059 $\pm$ 0.0131 (J2-619-IGT6, #OS-105947); Measured Fm = 0.1336 $\pm$ 0.0010, Corrected Fm = 0.0018 $\pm$ 0.0110 (J2-619-IGT3, #OS-104376).

**Table S2.** Additional aqueous fluid compositions in mixing zones at the Piccard vent field.

| Vent (Year)            | Sample <sup>a</sup> | Al<br>( $\mu\text{m}$ ) | Mn<br>( $\mu\text{m}$ ) | Zn<br>( $\mu\text{m}$ ) | Cu<br>( $\mu\text{m}$ ) | Pb<br>( $\mu\text{m}$ ) | Cd<br>(nm) | Ag<br>(nm) | Co<br>( $\mu\text{m}$ ) |
|------------------------|---------------------|-------------------------|-------------------------|-------------------------|-------------------------|-------------------------|------------|------------|-------------------------|
| Hot Chimlet 1 (2012)   | J2-619-IGT6         | 5.0                     | 244                     | 1.40                    | 15.3                    | 0.13                    | 3.5        | 59         | 0.28                    |
|                        | J2-619-IGT3         | 3.8                     | 270                     | 0.047                   | 0.38                    | <0.080                  | <1.0       | <1.0       | <0.002                  |
| Hot Chimlet 1 (2013)   | N59-IGT6            | 3.5                     | 125                     | 12.4                    | 9.01                    | 0.40                    | 4.5        | <1.0       | 0.051                   |
|                        | N59-IGT4            | 2.1                     | 31.0                    | 4.85                    | 8.67                    | 0.53                    | 3.0        | <1.0       | 0.018                   |
| Hot Chimlet 3 (2013)   | N62-IGT8            | <0.010                  | 75                      | 4.02                    | 8.08                    | 0.78                    | 7.3        | <1.0       | <0.002                  |
|                        | N62-IGT7            | 1.4                     | 199                     | 6.19                    | 6.09                    | 0.27                    | 5.2        | <1.0       | 0.03                    |
| Hot Chimlet 2 (2012)   | J2-620-IGT4         | 3.8                     | 96.9                    | 2.37                    | 21.9                    | 0.21                    | 4.6        | 97         | 0.10                    |
|                        | J2-620-IGT8         | 4.3                     | 66.0                    | 2.45                    | 14.0                    | 0.097                   | 3.0        | 46         | 0.17                    |
| Shrimp Gulley 1 (2012) | J2-620-IGT1         | 8.4                     | 114                     | 5.17                    | 21.4                    | 0.31                    | 7.5        | 102        | 0.19                    |
|                        | J2-620-IGT2         | 1.9                     | 90.9                    | 5.29                    | 208                     | 0.12                    | 9.7        | 38         | 2.9                     |
| Shrimp Gulley 3 (2013) | N63-IGT6            | 0.17                    | 77.7                    | 18.1                    | 76.2                    | 1.5                     | 13         | <1.0       | 0.051                   |
| Shrimp Gulley 2 (2012) | J2-618-IGT1         | 1.3                     | 44.7                    | 1.31                    | 7.77                    | <0.080                  | 1.3        | 22         | 0.12                    |
|                        | J2-618-IGT3         | 4.7                     | 43.9                    | 6.31                    | 39.8                    | 0.49                    | 11         | 56         | <0.002                  |
| Bottom Seawater        |                     | 0                       | 0                       | 0                       | 0                       | 0                       | 0          | 0          | 0                       |

<sup>a</sup>Jason (J2) or Nereus (N##) dive number and isobaric gas-tight sampler number (-IGT).

*Calculation of positive and negative deviations from theoretical conservative mixtures*

A conservative mixing line between the seawater value and the Beebe endmember composition was drawn for  $Mg^{2+}$  and select species plotted in Fig. 1. The measured dissolved  $Mg^{2+}$  for each mixed fluid was input into this linear regression to solve for a ‘calculated conservative mixture’ composition (Table S3). The difference between the actual measured mixed fluid composition and this theoretical composition is tabulated in Table S3 as either a negative value, when a species has been lost during mixing, or as a positive value, when a species has been gained during mixing.

**Table S3.** Calculated positive and negative deviations from theoretical conservative mixtures of select aqueous species.

| Vent (Year)            | Sample <sup>a</sup> | Assessment of Conservative or Non-Conservative Behavior with Mixing | H <sub>2</sub> (mm) | CH <sub>4</sub> (mm) | SO <sub>4</sub> (mm) | ΣH <sub>2</sub> S (mm) | Fe (mm) | Ca (mm) |
|------------------------|---------------------|---------------------------------------------------------------------|---------------------|----------------------|----------------------|------------------------|---------|---------|
| Hot Chimlet 1 (2012)   | J2-619-IGT6         | Calculated Conservative Mixture                                     | 6.32                | 0.0394               | 18.9                 | 3.81                   | 2.14    | 9.14    |
| Hot Chimlet 1 (2012)   | J2-619-IGT6         | Observed Loss (-) or Gain (+)                                       | -4.38               | 0.0118               | -3.7                 | -1.34                  | -1.29   | -1.99   |
| Hot Chimlet 1 (2012)   | J2-619-IGT3         | Calculated Conservative Mixture                                     | 7.07                | 0.0441               | 17.9                 | 2.46                   | 2.40    | 9.01    |
| Hot Chimlet 1 (2012)   | J2-619-IGT3         | Observed Loss (-) or Gain (+)                                       | -5.01               | 0.0124               | -4.1                 | -1.66                  | -1.99   | -2.20   |
| Hot Chimlet 1 (2013)   | N59-IGT6            | Calculated Conservative Mixture                                     | 4.08                | 0.0254               | 22.2                 | 2.46                   | 1.39    | 9.51    |
| Hot Chimlet 1 (2013)   | N59-IGT6            | Observed Loss (-) or Gain (+)                                       | -4.06               | 0.0142               | -1.5                 | -0.99                  | -0.88   | 0.93    |
| Hot Chimlet 1 (2013)   | N59-IGT4            | Calculated Conservative Mixture                                     | 0.78                | 0.00487              | 26.9                 | 0.47                   | 0.27    | 10.07   |
| Hot Chimlet 1 (2013)   | N59-IGT4            | Observed Loss (-) or Gain (+)                                       | -0.77               | 0.00491              | -0.5                 | -0.38                  | -0.09   | 0.24    |
| Hot Chimlet 2 (2012)   | J2-620-IGT4         | Calculated Conservative Mixture                                     | 2.62                | 0.0164               | 24.2                 | 1.58                   | 0.89    | 9.76    |
| Hot Chimlet 2 (2012)   | J2-620-IGT4         | Observed Loss (-) or Gain (+)                                       | -1.94               | 0.0054               | 0.0                  | -0.55                  | -0.74   | -0.41   |
| Hot Chimlet 2 (2012)   | J2-620-IGT8         | Calculated Conservative Mixture                                     | 1.72                | 0.0107               | 25.5                 | 1.04                   | 0.59    | 9.91    |
| Hot Chimlet 2 (2012)   | J2-620-IGT8         | Observed Loss (-) or Gain (+)                                       | -1.21               | 0.0049               | -2.4                 | -0.08                  | -0.43   | -0.16   |
| Hot Chimlet 3 (2013)   | N62-IGT7            | Calculated Conservative Mixture                                     | 6.43                | 0.0401               | 18.8                 | 3.88                   | 2.18    | 9.12    |
| Hot Chimlet 3 (2013)   | N62-IGT7            | Observed Loss (-) or Gain (+)                                       | -5.98               | 0.0242               | -2.2                 | -1.85                  | -1.83   | 1.11    |
| Hot Chimlet 3 (2013)   | N62-IGT8            | Calculated Conservative Mixture                                     | 1.99                | 0.0124               | 25.1                 | 1.20                   | 0.68    | 9.87    |
| Hot Chimlet 3 (2013)   | N62-IGT8            | Observed Loss (-) or Gain (+)                                       | -1.87               | 0.0105               | -0.4                 | -0.75                  | 0.35    | 0.45    |
| Shrimp Gulley 1 (2012) | J2-620-IGT1         | Calculated Conservative Mixture                                     | 3.73                | 0.0233               | 22.7                 | 2.25                   | 1.27    | 9.57    |
| Shrimp Gulley 1 (2012) | J2-620-IGT1         | Observed Loss (-) or Gain (+)                                       | -3.33               | 0.0007               | -0.1                 | -0.30                  | 0.62    | 0.10    |
| Shrimp Gulley 1 (2012) | J2-620-IGT2         | Calculated Conservative Mixture                                     | 2.84                | 0.0177               | 23.9                 | 1.71                   | 0.96    | 9.72    |
| Shrimp Gulley 1 (2012) | J2-620-IGT2         | Observed Loss (-) or Gain (+)                                       | -2.56               | 0.0028               | -1.2                 | -0.59                  | 0.62    | 0.33    |
| Shrimp Gulley 2 (2012) | J2-618-IGT1         | Calculated Conservative Mixture                                     | 1.89                | 0.0118               | 25.3                 | 1.13                   | 0.64    | 9.88    |
| Shrimp Gulley 2 (2012) | J2-618-IGT1         | Observed Loss (-) or Gain (+)                                       | -1.77               | -0.0010              | 0.1                  | -0.31                  | -0.55   | 0.32    |
| Shrimp Gulley 2 (2012) | J2-618-IGT3         | Calculated Conservative Mixture                                     | 1.32                | 0.0082               | 26.1                 | 0.79                   | 0.45    | 9.98    |
| Shrimp Gulley 2 (2012) | J2-618-IGT3         | Observed Loss (-) or Gain (+)                                       | -1.35               | 0.0027               | -0.9                 | 0.04                   | -0.34   | 0.10    |
| Shrimp Gulley 3 (2013) | N63-IGT6            | Calculated Conservative Mixture                                     | 1.70                | 0.0106               | 25.6                 | 1.02                   | 0.58    | 9.91    |
| Shrimp Gulley 3 (2013) | N63-IGT6            | Observed Loss (-) or Gain (+)                                       | -1.70               | 0.0093               | -1.0                 | -0.52                  | 1.98    | 0.19    |

<sup>a</sup>Jason (J2) or Nereus (N##) dive number and isobaric gas-tight sampler number (-IGT).

**Table S4.** Measured metal concentrations in the 'dissolved' fraction of Piccard fluids.

| Vent (Year)            | Sample      | Al<br>$\mu\text{m}^3$ | Fe<br>$\mu\text{m}$ | Mn<br>$\mu\text{m}$ | Zn<br>$\mu\text{m}$ | Cu<br>$\mu\text{m}$ | Pb<br>$\mu\text{m}$ | Cd<br>$\mu\text{m}$ | Ag<br>$\mu\text{m}$ | Co<br>$\mu\text{m}$ |
|------------------------|-------------|-----------------------|---------------------|---------------------|---------------------|---------------------|---------------------|---------------------|---------------------|---------------------|
| Hot Chimlet 1 (2012)   | J2-619-IGT6 | 1.3                   | 122                 | 241                 | 0.17                | <0.11               | <0.080              | <0.089              | <0.093              | <0.17               |
| Hot Chimlet 1 (2012)   | J2-619-IGT3 | 3.3                   | 100                 | 268                 | <0.10               | <0.11               | <0.080              | <0.089              | <0.093              | <0.17               |
| Hot Chimlet 1 (2013)   | N59-IGT6    | <0.37                 | 75                  | 121                 | 8.8                 | 0.93                | <0.080              | <0.089              | <0.093              | <0.17               |
| Hot Chimlet 1 (2013)   | N59-IGT4    | <0.37                 | 13                  | 29                  | 3.3                 | 0.40                | <0.080              | <0.089              | <0.093              | <0.17               |
| Hot Chimlet 3 (2013)   | N62-IGT8    | <0.37                 | 1032                | 75                  | 4.0                 | 8.1                 | 0.78                | <0.089              | <0.093              | <0.17               |
| Hot Chimlet 3 (2013)   | N62-IGT7    | 2.4                   | 36                  | 197                 | 2.7                 | 0.26                | <0.080              | <0.089              | <0.093              | <0.17               |
| Hot Chimlet 2 (2012)   | J2-620-IGT4 | 1.9                   | 42                  | 96                  | <0.10               | <0.11               | <0.080              | <0.089              | <0.093              | <0.17               |
| Hot Chimlet 2 (2012)   | J2-620-IGT8 | 0.39                  | 31                  | 65                  | 0.29                | <0.11               | <0.080              | <0.089              | <0.093              | <0.17               |
| Shrimp Gulley 1 (2012) | J2-620-IGT1 | 0.46                  | 40                  | 101                 | 1.0                 | <0.11               | <0.080              | <0.089              | <0.093              | <0.17               |
| Shrimp Gulley 1 (2012) | J2-620-IGT2 | <0.37                 | 52                  | 88                  | 0.11                | <0.11               | <0.080              | <0.089              | <0.093              | <0.17               |
| Shrimp Gulley 3 (2013) | N63-IGT6    | <0.37                 | 388                 | 65                  | 11                  | 8.3                 | 0.43                | <0.089              | <0.093              | <0.17               |
| Shrimp Gulley 2 (2012) | J2-618-IGT1 | <0.37                 | 26                  | 44                  | 0.16                | <0.11               | <0.080              | <0.089              | <0.093              | <0.17               |
| Shrimp Gulley 2 (2012) | J2-618-IGT3 | 3.4                   | 24                  | 43                  | 1.9                 | <0.11               | <0.080              | <0.089              | <0.093              | <0.17               |

<sup>a</sup>mm, mmol/kg;  $\mu\text{m}$ ,  $\mu\text{mol/kg}$

**Table S5.** Measured metal concentrations in the 'filter' fraction of Piccard fluids.

| Vent (Year)            | Sample      | Al<br>$\mu\text{m}^{\text{a}}$ | Fe<br>$\mu\text{m}$ | Mn<br>$\mu\text{m}$ | Zn<br>$\mu\text{m}$ | Cu<br>$\mu\text{m}$ | Pb<br>$\mu\text{m}$ | Cd<br>$\mu\text{m}$ | Ag<br>$\mu\text{m}$ | Co<br>$\mu\text{m}$ |
|------------------------|-------------|--------------------------------|---------------------|---------------------|---------------------|---------------------|---------------------|---------------------|---------------------|---------------------|
| Hot Chimlet 1 (2012)   | J2-619-IGT6 | 0.14                           | 14                  | 1.1                 | 0.10                | 0.88                | <0.080              | <0.0010             | <0.0010             | <0.0017             |
| Hot Chimlet 1 (2012)   | J2-619-IGT3 | 0.46                           | 46                  | 2.0                 | 0.047               | 0.38                | <0.080              | <0.0010             | <0.0010             | <0.0017             |
| Hot Chimlet 1 (2013)   | N59-IGT6    | – <sup>b</sup>                 | –                   | –                   | –                   | –                   | –                   | –                   | –                   | –                   |
| Hot Chimlet 1 (2013)   | N59-IGT4    | –                              | –                   | –                   | –                   | –                   | –                   | –                   | –                   | –                   |
| Hot Chimlet 3 (2013)   | N62-IGT8    | –                              | –                   | –                   | –                   | –                   | –                   | –                   | –                   | –                   |
| Hot Chimlet 3 (2013)   | N62-IGT7    | –                              | –                   | –                   | –                   | –                   | –                   | –                   | –                   | –                   |
| Hot Chimlet 2 (2012)   | J2-620-IGT4 | 0.019                          | 7.4                 | 0.35                | 0.13                | 0.55                | <0.080              | <0.0010             | <0.0010             | 0.0025              |
| Hot Chimlet 2 (2012)   | J2-620-IGT8 | <0.010                         | 3.7                 | 0.16                | 0.048               | <0.011              | <0.080              | <0.0010             | <0.0010             | <0.0017             |
| Shrimp Gulley 1 (2012) | J2-620-IGT1 | 0.034                          | 36                  | 1.0                 | 0.45                | 0.58                | <0.080              | <0.0010             | <0.0010             | 0.0063              |
| Shrimp Gulley 1 (2012) | J2-620-IGT2 | <0.010                         | 2.6                 | 0.70                | 0.10                | <0.011              | <0.080              | <0.0010             | <0.0010             | 0.0023              |
| Shrimp Gulley 3 (2013) | N63-IGT6    | –                              | –                   | –                   | –                   | –                   | –                   | –                   | –                   | –                   |
| Shrimp Gulley 2 (2012) | J2-618-IGT1 | <0.010                         | 3.3                 | 0.20                | 0.030               | 0.28                | <0.080              | <0.0010             | <0.0010             | 0.0029              |
| Shrimp Gulley 2 (2012) | J2-618-IGT3 | <0.010                         | 0.5                 | 0.56                | 0.17                | 0.72                | <0.080              | <0.0010             | 0.0041              | <0.0017             |

<sup>a</sup>mm, mmol/kg;  $\mu\text{m}$ ,  $\mu\text{mol/kg}$ <sup>b</sup>– not measured

**Table S6.** Measured metal concentrations in the 'dregs' fraction of Piccard fluids.

| Vent (Year)            | Sample      | Al<br>$\mu\text{m}^{\text{a}}$ | Fe<br>$\mu\text{m}$ | Mn<br>$\mu\text{m}$ | Zn<br>$\mu\text{m}$ | Cu<br>$\mu\text{m}$ | Pb<br>$\mu\text{m}$ | Cd<br>$\mu\text{m}$ | Ag<br>$\mu\text{m}$ | Co<br>$\mu\text{m}$ |
|------------------------|-------------|--------------------------------|---------------------|---------------------|---------------------|---------------------|---------------------|---------------------|---------------------|---------------------|
| Hot Chimlet 1 (2012)   | J2-619-IGT6 | 3.54                           | 719                 | 2.2                 | 1.1                 | 14                  | 0.11                | 0.0035              | 0.059               | 0.27                |
| Hot Chimlet 1 (2012)   | J2-619-IGT3 | – <sup>b</sup>                 | –                   | –                   | –                   | –                   | –                   | –                   | –                   | –                   |
| Hot Chimlet 1 (2013)   | N59-IGT6    | 3.48                           | 426                 | 4.1                 | 3.5                 | 8.1                 | 0.36                | 0.0045              | <0.018              | 0.049               |
| Hot Chimlet 1 (2013)   | N59-IGT4    | 2.14                           | 162                 | 2.0                 | 1.6                 | 8.3                 | 0.48                | 0.0030              | <0.018              | 0.018               |
| Hot Chimlet 3 (2013)   | N62-IGT8    | –                              | –                   | –                   | –                   | –                   | –                   | –                   | –                   | –                   |
| Hot Chimlet 3 (2013)   | N62-IGT7    | 1.36                           | 310                 | 1.9                 | 3.5                 | 5.8                 | 0.27                | 0.0052              | <0.018              | 0.034               |
| Hot Chimlet 2 (2012)   | J2-620-IGT4 | 1.86                           | 97.6                | 0.57                | 2.2                 | 21                  | 0.17                | 0.0046              | 0.097               | 0.098               |
| Hot Chimlet 2 (2012)   | J2-620-IGT8 | 3.93                           | 126                 | 0.90                | 2.1                 | 14                  | 0.10                | 0.0030              | 0.046               | 0.17                |
| Shrimp Gulley 1 (2012) | J2-620-IGT1 | 7.88                           | 1815                | 12                  | 3.7                 | 21                  | 0.30                | 0.0075              | 0.102               | 0.18                |
| Shrimp Gulley 1 (2012) | J2-620-IGT2 | 1.92                           | 1529                | 2.0                 | 5.1                 | 208                 | 0.12                | 0.0097              | 0.038               | 2.9                 |
| Shrimp Gulley 3 (2013) | N63-IGT6    | 0.174                          | 2168                | 13                  | 6.7                 | 68                  | 1.0                 | 0.0082              | <0.018              | 0.051               |
| Shrimp Gulley 2 (2012) | J2-618-IGT1 | 0.923                          | 62.3                | 0.46                | 1.1                 | 7.5                 | 0.077               | 0.0013              | 0.022               | 0.11                |
| Shrimp Gulley 2 (2012) | J2-618-IGT3 | 1.32                           | 88.7                | 0.61                | 4.2                 | 39                  | 0.49                | 0.011               | 0.052               | <0.0017             |

<sup>a</sup>mm, mmol/kg;  $\mu\text{m}$ ,  $\mu\text{mol/kg}$ <sup>b</sup>–' not measured

### *Thermodynamic Modelling*

Two geochemical reaction path models were used to assess the impact of abiotic and thermogenic reactions during mixing on the amount of chemical energy available to support microbial metabolisms. Both models involved incremental mixing of a hydrothermal fluid with 2°C seawater over a temperature range of 160 to 5°C at 500 bar pressure. The initial temperature of 160°C represents the temperature calculated for the formation of the Hot Chimlet 1 fluid based on its measured Mg concentration by the mixing of the 398°C endmember Beebe Vent fluid with 2°C seawater, assuming that the heat capacity of the fluids remains constant with temperature. The lower measured temperature of 149°C at Hot Chimlet 1 likely reflects technical challenges associated with placing the temperature probe in the region of hottest flow during seafloor measurement. For the first model, the starting composition of the hydrothermal fluid represents a conservative mixture of the endmember Beebe Vent fluid with anaerobic seawater to achieve a Mg concentration identical to the Hot Chimlet 1 fluid. For the second model, the composition of the fluid in 2012 (J2-619-IGT6, Table 1) was used for the starting composition of the hydrothermal fluid. At each step during the incremental mixing of hydrothermal fluid and seawater, the equilibrium distribution of aqueous species was calculated for that temperature using Version 8.0a of the EQ3/6 computer program (2) and a thermodynamic database generated at 500 bar using SUPCRT92 (3), as compiled in Klein and Bach (4) and Klein et al (5). The modeling approach is similar to that used previously to study the distribution of energy types in seafloor hydrothermal systems (6, 7). Redox equilibrium was suppressed for all species, including O<sub>2</sub> and H<sub>2</sub>, and those that contain C, S, and Fe. These assumptions are based on the observation of slow reaction kinetics at moderate temperatures for the equilibration of sulfate-sulfide (8), inorganic carbon-methane (9), and H<sub>2</sub>-O<sub>2</sub> (10). The precipitation of all minerals was suppressed. It was assumed that fully oxidized seawater containing 0.2 mmol/kg O<sub>2</sub> (11) and the measured composition in Table 1 was available to mix with hydrothermal fluids at all temperatures. Activity coefficients for the neutrally charged aqueous gases H<sub>2</sub>, CH<sub>4</sub>, O<sub>2</sub> were assumed to be equal to 1, while other activity coefficients were set by the EQ3/6 model output.

Model results were used to calculate the maximum amount of potential chemical energy available to support five chemolithoautotrophic metabolic pathways: sulfate reduction, methanogenesis, methanotrophy, sulfide oxidation, and hydrogen oxidation, according to the reactions:

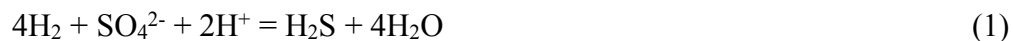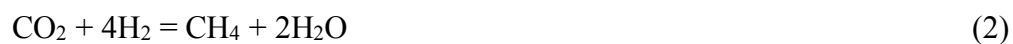

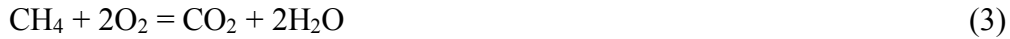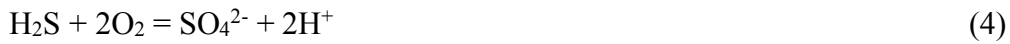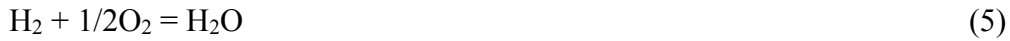

The amount of metabolic energy that is potentially available to a microorganism carrying out a particular metabolic reaction is calculated using the equation:

$$\Delta G = \Delta G^\circ + RT \ln Q \quad (5)$$

Where  $\Delta G^\circ$  symbolizes the standard free energy of reaction,  $\Delta G$  the free energy of reaction,  $R$  the universal gas constant,  $T$  the temperature in Kelvin, and  $Q$  the activity product of the reactant and product species. In order to describe the available energy in joules per kilogram of mixed fluid, the calculated  $\Delta G$  value for each model step was multiplied by the concentration of the compound that would be limiting, scaled to reaction stoichiometry (6, 7). The stoichiometric scaling factor is the same in both scenarios, as is the  $\text{O}_2$  concentration at each mixing step, but the  $\text{H}_2$  concentration differs on account of the different starting compositions. For reactions 1 and 2, the limiting reactant is assumed to be  $\text{H}_2$ , while for reactions 2-4 the limiting reactant is assumed to be  $\text{O}_2$ . For reaction 5, the limiting reactant is  $\text{O}_2$  at higher temperatures when  $\text{H}_2$  is relatively more abundant. This limiting reactant then switches to  $\text{H}_2$  at lower temperatures as  $\text{O}_2$  increases in relative availability. This switch from limiting  $\text{O}_2$  to limiting  $\text{H}_2$  occurred at a temperature of 13°C and 31°C, for scenarios 1 and 2, respectively. At each mixing increment at temperatures less than or equal to 122°C, the percent difference between the potential energy available in the actual Hot Chimlet 1 (2012) fluid and that in the theoretical fluid was calculated for reactions 1-5. This approach determines the impact of  $\text{H}_2$  and  $\text{SO}_4$  losses and  $\text{CH}_4$  gains on energy availability in a natural system that is impacted by abiotic and thermogenic reactions occurring at moderate temperatures above the limit for life, but well below source fluid temperatures. Energy availability in the actual fluid is then compared to what might otherwise be expected based on conservative mixtures that model theoretical mixed fluid chemistries by starting with the composition of a 350-400°C source fluid.



**Table S7.** Composition of theoretical starting composition of hydrothermal fluid in scenario 1.

|                               |                  |         |
|-------------------------------|------------------|---------|
| T                             | (°C)             | 160     |
| pH                            | (160°C, 500 bar) | 7.15    |
| O <sub>2</sub> , aq           | (mmol/kg)        | 0       |
| H <sub>2</sub> , aq           | (mmol/kg)        | 1.95    |
| SO <sub>4</sub> <sup>2-</sup> | (mmol/kg)        | 18.9    |
| ΣH <sub>2</sub> S             | (mmol/kg)        | 3.81    |
| Na <sup>+</sup>               | (mmol/kg)        | 419     |
| Ca <sup>2+</sup>              | (mmol/kg)        | 9.14    |
| Mg <sup>2+</sup>              | (mmol/kg)        | 35.4    |
| Al <sup>3+</sup>              | (mmol/kg)        | 0.00500 |
| Fe <sup>2+</sup>              | (mmol/kg)        | 2.14    |
| Cl <sup>-</sup>               | (mmol/kg)        | 484     |
| ΣCO <sub>2</sub>              | (mmol/kg)        | 9.09    |
| CH <sub>4</sub>               | (mmol/kg)        | 0.0394  |
| SiO <sub>2</sub> , aq         | (mmol/kg)        | 5.80    |
| K <sup>+</sup>                | (mmol/kg)        | 10.3    |
| Mn <sup>2+</sup>              | (mmol/kg)        | 0.244   |

**SUPPLEMENTARY INFORMATION REFERENCES**

1. J. S. Seewald, *et al.*, Submarine venting of magmatic volatiles in the Eastern Manus Basin, Papua New Guinea. *Geochim. Cosmochim. Acta* **163**, 178–199 (2015).
2. T. J. Wolery, “EQ3NR, a computer program for geochemical aqueous speciation-solubility calculations: Theoretical manual, user’s guide, and related documentation” (1992)  
<https://doi.org/10.2172/138643>.
3. J. W. Johnson, E. H. Oelkers, H. C. Helgeson, SUPCRT92: A software package for calculating the standard molal thermodynamic properties of minerals, gases, aqueous species, and reactions from 1 to 5000 bar and 0 to 1000°C. *Comput. Geosci.* **18**, 899–947 (1992).
4. F. Klein, W. Bach, Fe-Ni-Co-O-S Phase Relations in Peridotite-Seawater Interactions. *J. Petrol.* **50**, 37–59 (2009).
5. F. Klein, W. Bach, T. M. McCollom, Compositional controls on hydrogen generation during serpentinization of ultramafic rocks. *Lithos* **178**, 55–69 (2013).
6. T. M. McCollom, E. L. Shock, Geochemical constraints on chemolithoautotrophic metabolism by microorganisms in seafloor hydrothermal systems. *Geochim. Cosmochim. Acta* **61**, 4375–4391 (1997).

7. T. M. McCollom, Geochemical constraints on sources of metabolic energy for chemolithoautotrophy in ultramafic-hosted deep-sea hydrothermal systems. *Astrobiology* **7**, 933–950 (2007).
8. H. Ohmoto, A. C. Lasaga, Kinetics of reactions between aqueous sulfates and sulfides in hydrothermal systems. *Geochim. Cosmochim. Acta* **46**, 1727–1745 (1982).
9. T. M. McCollom, Abiotic methane formation during experimental serpentinization of olivine. *Proc. Natl. Acad. Sci.* **113**, 13965–13970 (2016).
10. D. I. Foustoukos, J. L. Houghton, W. E. Seyfried, S. M. Sievert, G. D. Cody, Kinetics of H<sub>2</sub>–O<sub>2</sub>–H<sub>2</sub>O redox equilibria and formation of metastable H<sub>2</sub>O<sub>2</sub> under low temperature hydrothermal conditions. *Geochim. Cosmochim. Acta* **75**, 1594–1607 (2011).
11. T. M. Joyce, A. Hernandez-Guerra, M. Smethie Jr., Zonal circulation in the NW Atlantic and Caribbean from a meridional World Ocean Circulation Experiment hydrographic section at 66°W. **106**, 22095–22113 (2001).
